# Supplementary material for: Immunodominant NP105-113-B*0702 cytotoxic T cell response controls viral replication and is associated with less severe COVID-19 disease
Source: Research Square preprint supplement (doi:10.21203/rs.3.rs-734011/v1), 2021-07-27
Supplement: Supplementary file 3 [file 87171dfd5c6444b781072476.xlsx]

## Sheet: Sheet1
Patient	TRAV	TRAJ	Clone Name	CDR3α	TRBV	TRBJ	CDR3β
C-COV19-005	TRAV12-2	TRAJ40	005'-CL1	CAVTLTSGTYKYIF	TRBV27	TRBJ2-5	CASSPLVGERFRKETQYF
C-COV19-005	TRAV12-3	TRAJ34	005'-CL10	CAIPPLPGKLIF	TRBV12-5	TRBJ2-5	CASGPATSAEQETQYF
C-COV19-005	TRAV8-3	TRAJ5	005-CL11	CAVVTDTGRRALTF	TRBV2	TRBJ2-1	CASSVLPGPPRGEQFF
C-COV19-005	TRAV21	TRAJ43	005'-CL12	CAAPYNNNDMRF	TRBV9	TRBJ1-6	CASSVYPAPSDNSPLHF
C-COV19-005	TRAV12-2	TRAJ43	005-CL12	CAVRRDNDMRF	TRBV5-1	TRBJ2-1	CASSLLLSREQFF
C-COV19-005	TRAV12-2	TRAJ40	005'-CL13	CAVTLTSGTYKYIF	TRBV27	TRBJ2-5	CASSPLVGERFRKETQYF
C-COV19-005	TRAV25	TRAJ37	005'-CL14	CAGRSNTGKLIF	TRBV27	TRBJ2-5	CASSPLTGSAERKETQYF
C-COV19-005	TRAV8-3	TRAJ5	005-CL14	CAVVTDTGRRALTF	TRBV2	TRBJ2-1	CASSVLPGPPRGEQFF
C-COV19-005	TRAV19	TRAJ15	005'-CL15	CALSEARQAGTALIF	TRBV27	TRBJ2-1	CASSSLLAGGFYEQFF
C-COV19-005	TRAV8-3	TRAJ5	005-CL15	CAVVTDTGRRALTF	TRBV2	TRBJ2-1	CASSVLPGPPRGEQFF
C-COV19-005	TRAV21	TRAJ43	005'-CL16	CAAPYNNNDMRF	TRBV6-3	TRBJ1-6	CASSYLPAGSSYNSPLHF
C-COV19-005	TRAV36DV7	TRAJ30	005-CL16	CAVPRDDKIIF	TRBV19	TRBJ1-5	CASSILQGLGGSNQPQHF
C-COV19-005	TRAV8-4	TRAJ3	005'-CL17	CAVPLYSSASKIIF	TRBV7-8	TRBJ2-7	CASSSGSYEQYF
C-COV19-005	TRAV12-3	TRAJ34	005'-CL18	CAIPPLPGKLIF	TRBV12-5	TRBJ2-5	CASGPATSAEQETQYF
C-COV19-005	TRAV12-2	TRAJ40	005-CL18	CAVTLTSGTYKYIF	TRBV27	TRBJ2-5	CASSPLVGERFRKETQYF
C-COV19-005	TRAV19	TRAJ15	005'-CL2	CALSEARQAGTALIF	TRBV27	TRBJ2-1	CASSSLLAGGFYEQFF
C-COV19-005	TRAV38-1	TRAJ4	005'-CL20	CAFMKPGGYNKLIF	TRBV25-1	TRBJ2-3	CASSELITSTDTQYF
C-COV19-005	TRAV19	TRAJ15	005'-CL22	CALSEARGPALIF	TRBV20-1	TRBJ2-2	CTPWGEYTGELFF
C-COV19-005	TRAV21	TRAJ43	005'-CL23	CAAPYNNNDMRF	TRBV6-3	TRBJ1-6	CASSYLPAGSSYNSPLHF
C-COV19-005	TRAV8-3	TRAJ5	005-CL23	CAVVTDTGRRALTF	TRBV2	TRBJ2-1	CASSVLPGPPRGEQFF
C-COV19-005	TRAV21	TRAJ43	005'-CL24	CAAPYNNNDMRF	TRBV6-3	TRBJ1-6	CASSYLPAGSSYNSPLHF
C-COV19-005	TRAV12-3	TRAJ34	005'-CL25	CAIPPLPGKLIF	TRBV12-5	TRBJ2-5	CASGPATSAEQETQYF
C-COV19-005	TRAV12-2	TRAJ12	005'-CL27	CAVNIRADSSYKLIF	TRBV7-2	TRBJ1-1	CASRAGSTEAFF
C-COV19-005	TRAV19	TRAJ15	005'-CL28	CALSEARQAGTALIF	TRBV27	TRBJ2-1	CASSSLLAGGFYEQFF
C-COV19-005	TRAV12-2	TRAJ40	005'-CL29	CAVTLTSGTYKYIF	TRBV27	TRBJ2-5	CASSPLVGERFRKETQYF
C-COV19-005	TRAV8-3	TRAJ16	005'-CL3	CAVVRFSDGQKLLF	TRBV9	TRBJ1-6	CASSVYPAPSDNSPLHF
C-COV19-005	TRAV39	TRAJ16	005'-CL32	CAVDILFSDGQKLLF	TRBV5-6	TRBJ1-3	CASSFNSLDRSFFSGNTIYF
C-COV19-005	TRAV8-3	TRAJ16	005'-CL33	CAVVRFSDGQKLLF	TRBV9	TRBJ1-6	CASSVYPAPSDNSPLHF
C-COV19-005	TRAV13-1	TRAJ44	005'-CL34	CAASWGTASKLTF	TRBV6-5	TRBJ1-5	CASSSLTGNQPQHF
C-COV19-005	TRAV25	TRAJ37	005'-CL35	CAGRSNTGKLIF	TRBV27	TRBJ2-5	CASSPLTGSAERKETQYF
C-COV19-005	TRAV21	TRAJ31	005'-CL36	CAVLNNARLMF	TRBV5-1	TRBJ1-1	CASSLAGAEAFF
C-COV19-005	TRAV19	TRAJ15	005'-CL5	CALSEARGPALIF	TRBV5-1	TRBJ2-1	CASSLAGGSEQFF
C-COV19-005	TRAV8-3	TRAJ5	005'-CL6	CAVVTDTGRRALTF	TRBV2	TRBJ2-1	CASSVLPGPPRGEQFF
C-COV19-005	TRAV13-1	TRAJ44	005'-CL7	CAASWGTASKLTF	TRBV6-5	TRBJ1-5	CASSSLTGNQPQHF
C-COV19-005	TRAV12-3	TRAJ34	005'-CL8	CAIPPLPGKLIF	TRBV12-5	TRBJ2-5	CASGPATSAEQETQYF
C-COV19-005	TRAV8-3	TRAJ5	005-CL8	CAVVTDTGRRALTF	TRBV2	TRBJ2-1	CASSVLPGPPRGEQFF
C-COV19-045	TRAV20	TRAJ8	045-CL1	CAVQGRGNTGFQKLVF	TRBV20-1	TRBJ1-6	CSAQVGGNYNSPLHF
C-COV19-045	TRAV21	TRAJ30	045-CL10	CAVPIKNRDDKIIF	TRBV27	TRBJ2-4	CASSPIAGGRKNIQYF
C-COV19-045	TRAV12-3	TRAJ34	045-CL11	CAIPPLPGKLIF	TRBV12-5	TRBJ2-5	CASGPATSAEQETQYF
C-COV19-045	TRAV13-1	TRAJ4	045-CL12	CAASKGPGGYNKLIF	TRBV28	TRBJ1-2	CASSSITTTGAKDGYTF
C-COV19-045	TRAV13-1	TRAJ4	045-CL13	CAASKGPGGYNKLIF	TRBV28	TRBJ1-2	CASSSITTTGAKDGYTF
C-COV19-045	TRAV13-1	TRAJ18	045-CL14	CAAPKGRGSTLGRLYF	TRBV6-5	TRBJ1-4	CASSYSYRGTNEKLFF
C-COV19-045	TRAV21	TRAJ30	045-CL15	CAVPIKNRDDKIIF	TRBV27	TRBJ2-4	CASSPIAGGRKNIQYF
C-COV19-045	TRAV13-1	TRAJ4	045-CL16	CAASMAGGYNKLIF	TRBV25-1	TRBJ2-3	CASSGLTSLADTQYF
C-COV19-045	TRAV20	TRAJ8	045-CL17	CAVQGRGNTGFQKLVF	TRBV20-1	TRBJ1-6	CSAQVGGNYNSPLHF
C-COV19-045	TRAV20	TRAJ8	045-CL18	CAVQGRGNTGFQKLVF	TRBV20-1	TRBJ1-6	CSAQVGGNYNSPLHF
C-COV19-045	TRAV20	TRAJ8	045-CL19	CAVQGRGNTGFQKLVF	TRBV20-1	TRBJ1-6	CSAQVGGNYNSPLHF
C-COV19-045	TRAV20	TRAJ8	045-CL2	CAVQGRGNTGFQKLVF	TRBV20-1	TRBJ1-6	CSAQVGGNYNSPLHF
C-COV19-045	TRAV13-1	TRAJ4	045-CL20	CAASMAGGYNKLIF	TRBV25-1	TRBJ2-3	CASSGLTSLADTQYF
C-COV19-045	TRAV21	TRAJ30	045-CL21	CAVPAMNRDDKIIF	TRBV27	TRBJ1-5	CASRPLTGGNQPQHF
C-COV19-045	TRAV20	TRAJ8	045-CL22	CAVQGRGNTGFQKLVF	TRBV20-1	TRBJ1-6	CSAQVGGNYNSPLHF
C-COV19-045	TRAV20	TRAJ8	045-CL23	CAVQGRGNTGFQKLVF	TRBV27	TRBJ2-2	CASSVLGNHYTNGELFF
C-COV19-045	TRAV25	TRAJ40	045-CL24	CAVLTSGTYKYIF	TRBV7-8	TRBJ1-6	CASSQGGSPLHF
C-COV19-045	TRAV20	TRAJ8	045-CL3	CAVQGRGNTGFQKLVF	TRBV20-1	TRBJ1-6	CSAQVGGNYNSPLHF
C-COV19-045	TRAV25	TRAJ40	045-CL4	CAVLTSGTYKYIF	TRBV7-8	TRBJ1-6	CASSQGGSPLHF
C-COV19-045	TRAV13-1	TRAJ4	045-CL5	CAASKGPGGYNKLIF	TRBV28	TRBJ1-2	CASSSITTTGAKDGYTF
C-COV19-045	TRAV21	TRAJ30	045-CL6	CALPRENRDDKIIF	TRBV5-1	TRBJ2-1	CASSGRDSPSDEQFF
C-COV19-045	TRAV20	TRAJ8	045-CL7	CAVQGRGNTGFQKLVF	TRBV20-1	TRBJ1-6	CSAQVGGNYNSPLHF
C-COV19-045	TRAV13-1	TRAJ4	045-CL8	CAASMAGGYNKLIF	TRBV25-1	TRBJ2-3	CASSGLTSLADTQYF
C-COV19-045	TRAV12-2	TRAJ22	045-CL9	CAAFSGSARQLTF	TRBV5-1	TRBJ2-7	CASSIAGGSLHEQYF
C-COV19-038	TRAV21	TRAJ23	038-CL1	CAAPERNQGGKLIF	TRBV27	TRBJ2-4	CASSLITGGAKNIQYF
C-COV19-038	TRAV21	TRAJ23	038-CL10	CAAPERNQGGKLIF	TRBV27	TRBJ2-4	CASSLITGGAKNIQYF
C-COV19-038	TRAV4	TRAJ6	038-CL11	CLVGEAGGGSYIPTF	TRBV28	TRBJ2-1	CASSPLAGRAEQFF
C-COV19-038	TRAV29DV5	TRAJ10	038-CL12	CAASHPPRDTGGGNKLTF	TRBV24-1	TRBJ2-1	CATSDLVTSGDEQFF
C-COV19-038	TRAV41	TRAJ58	038-CL13	CAAGPSSGSRLTF	TRBV5-1	TRBJ1-2	CASSLAGVGYTF
C-COV19-038	TRAV21	TRAJ23	038-CL14	CAAPERNQGGKLIF	TRBV27	TRBJ2-4	CASSLITGGAKNIQYF
C-COV19-038	TRAV4	TRAJ6	038-CL15	CLVGEAGGGSYIPTF	TRBV28	TRBJ2-1	CASSPLAGRAEQFF
C-COV19-038	TRAV4	TRAJ6	038-CL16	CLVGEAGGGSYIPTF	TRBV28	TRBJ2-1	CASSPLAGRAEQFF
C-COV19-038	TRAV21	TRAJ23	038-CL17	CAAPERNQGGKLIF	TRBV27	TRBJ2-4	CASSLITGGAKNIQYF
C-COV19-038	TRAV12-3	TRAJ4	038-CL18	CAMSAESGGYNKLIF	TRBV24-1	TRBJ2-1	CATSDLTRDEQFF
C-COV19-038	TRAV12-2	TRAJ31	038-CL19	CAVNKGNNARLMF	TRBV5-1	TRBJ2-1	CASSLAGGPLHEQFF
C-COV19-038	TRAV21	TRAJ23	038-CL2	CAAPERNQGGKLIF	TRBV27	TRBJ2-4	CASSLITGGAKNIQYF
C-COV19-038	TRAV21	TRAJ58	038-CL20	CAVQETSGSRLTF	TRBV5-1	TRBJ2-7	CASSLAGVEQYF
C-COV19-038	TRAV26-2	TRAJ52	038-CL21	CILKAVGTSYGKLTF	TRBV10-3	TRBJ2-3	CAISEPGTSGGAILDTQYF
C-COV19-038	TRAV26-2	TRAJ52	038-CL22	CILKAVGTSYGKLTF	TRBV10-3	TRBJ2-3	CAISEPGTSGGAILDTQYF
C-COV19-038	TRAV21	TRAJ23	038-CL23	CAAPERNQGGKLIF	TRBV27	TRBJ2-4	CASSLITGGAKNIQYF
C-COV19-038	TRAV21	TRAJ58	038-CL24	CAVQETSGSRLTF	TRBV5-1	TRBJ1-1	CASSLAGVEAFF
C-COV19-038	TRAV29DV5	TRAJ10	038-CL3	CAASHPPRDTGGGNKLTF	TRBV24-1	TRBJ2-1	CATSDLVTSGDEQFF
C-COV19-038	TRAV21	TRAJ44	038-CL4	CAVATTGTASKLTF	TRBV5-1	TRBJ2-5	CASSRAAGPQETQYF
C-COV19-038	TRAV21	TRAJ23	038-CL5	CAAPERNQGGKLIF	TRBV27	TRBJ2-4	CASSLITGGAKNIQYF
C-COV19-038	TRAV21	TRAJ23	038-CL6	CAAPERNQGGKLIF	TRBV27	TRBJ2-4	CASSLITGGAKNIQYF
C-COV19-038	TRAV12-2	TRAJ31	038-CL7	CAVNKGNNARLMF	TRBV5-1	TRBJ2-1	CASSLAGGPLHEQFF
C-COV19-038	TRAV12-2	TRAJ31	038-CL8	CAVNKGNNARLMF	TRBV5-1	TRBJ2-1	CASSLAGGPLHEQFF
C-COV19-038	TRAV21	TRAJ58	038-CL9	CAVQETSGSRLTF	TRBV27	TRBJ2-4	CASSLITGGAKNIQYF
C-COV19-046	TRAV2	TRAJ30	046-CL10	CAVEKMNRDDKIIF	TRBV5-1	TRBJ2-5	CASSSYPGLAPVQETQYF
C-COV19-046	TRAV19	TRAJ8	046-CL12	CALSEAGNTGFQKLVF	TRBV28	TRBJ2-4	CASSPIETAKNIQYF
C-COV19-046	TRAV2	TRAJ30	046-CL15	CAVEKMNRDDKIIF	TRBV5-1	TRBJ2-5	CASSSYPGLAPVQETQYF
C-COV19-046	TRAV2	TRAJ30	046-CL16	CAVEKMNRDDKIIF	TRBV5-1	TRBJ2-5	CASSSYPGLAPVQETQYF
C-COV19-046	TRAV8-1	TRAJ40	046-CL20	CAVTSTTSGTYKYIF	TRBV27	TRBJ2-5	CASSPLVGLAGEKETQYF
C-COV19-046	TRAV2	TRAJ30	046-CL23	CAVEKMNRDDKIIF	TRBV5-1	TRBJ2-5	CASSSYPGLAPVQETQYF
C-COV19-046	TRAV2	TRAJ37	046-CL26	CAVWVTGKLIF	TRBV27	TRBJ2-1	CASSSILGGEAYNEQFF
C-COV19-046	TRAV17	TRAJ45	046-CL29	CATGPSGGGADGLTF	TRBV12-4	TRBJ1-1	CASTNTVQLYMNTEAFF
C-COV19-046	TRAV8-1	TRAJ40	046-CL3	CAVTSTTSGTYKYIF	TRBV27	TRBJ2-5	CASSPLVGLAGEKETQYF
C-COV19-046	TRAV17	TRAJ40	046-CL31	CATPRSGTYKYIF	TRBV20-1	TRBJ2-7	CSALSSETSGPYEQYF
C-COV19-046	TRAV17	TRAJ40	046-CL32	CATPRSGTYKYIF	TRBV20-1	TRBJ2-7	CSALSSETSGPYEQYF
C-COV19-046	TRAV2	TRAJ30	046-CL8	CAVEKMNRDDKIIF	TRBV5-1	TRBJ2-5	CASSSYPGLAPVQETQYF
