# Supplementary material for: Immunodominant NP105-113-B*0702 cytotoxic T cell response controls viral replication and is associated with less severe COVID-19 disease
Source: Research Square preprint supplement (doi:10.21203/rs.3.rs-734011/v1), 2021-07-27
Supplement: Supplementary file 6 [file 014afdc3eb62855991c533fb.xlsx]

## Sheet: Sheet1
CloneName	EC50	Group	Functional Avidity
038-CL21	0.2031	1	low
038-CL22	0.104	1	low
005'-CL10	0.04875	2	high
005'-CL18	0.08416	2	high
005'-CL25	0.05868	2	high
005'-CL8	0.0664	2	high
045-CL11	0.1447	2	high
005-CL16	0.1298	3	low
005-CL11	0.05819	4	high
005-CL14	0.04033	4	high
005-CL15	0.06395	4	high
005-CL23	0.08435	4	high
005'-CL6	0.06858	4	high
005-CL8	0.05341	4	high
045-CL1	0.04514	5	high
045-CL19	0.05766	5	high
045-CL2	0.06191	5	high
045-CL22	0.06503	5	high
045-CL23	0.08284	5	high
045-CL3	0.05151	5	high
045-CL7	0.0474	5	high
038-CL12	0.1024	6	low
038-CL3	0.1635	6	low
045-CL16	0.1079	7	high
045-CL20	0.09169	7	high
045-CL8	0.04087	7	high
038-CL1	0.09296	8	low
038-CL10	0.09831	8	low
038-CL14	0.1718	8	low
038-CL17	0.08559	8	low
038-CL2	0.1218	8	low
038-CL20	0.1058	8	low
038-CL23	0.09774	8	low
038-CL5	0.1496	8	low
038-CL6	0.08435	8	low
045-CL10	0.1134	9	low
045-CL15	0.1114	9	low
005'-CL14	0.1378	10	high
005'-CL35	0.0405	10	high
005'-CL1	0.09867	11	low
005'-CL13	0.1543	11	low
005-CL18	0.09319	11	low
005'-CL29	0.2058	11	low
005'-CL15	0.1102	12	low
005'-CL2	0.1095	12	low
005'-CL28	0.1381	12	low
046-CL12	0.1112	13	low
045-CL13	0.09437	14	high
045-CL5	0.0248	14	high
005'-CL36	0.1016	15	high
038-CL19	0.217	16	low
038-CL7	0.1398	16	low
038-CL8	0.093	16	low
046-CL10	0.06106	17	high
046-CL15	0.1367	17	high
046-CL23	0.1342	17	high
046-CL8	0.06082	17	high
005'-CL12	0.05349	18	high
005'-CL16	0.04972	18	high
005'-CL23	0.118	18	high
