# Supplementary material for: Immunodominant NP105-113-B*0702 cytotoxic T cell response controls viral replication and is associated with less severe COVID-19 disease
Source: Research Square preprint supplement (doi:10.21203/rs.3.rs-734011/v1), 2021-07-27
Supplement: Supplementary file 7 [file 75dcaf41c899f8b90eb0bbc7.xlsx]

## Sheet: Sheet1
Author List					Affiliation List
NAME	EMAIL ADDRESS	AFFILIATION	ORCID iD		Number	Unit/Institute	Department
David J Ahern	david.ahern@kennedy.ox.ac.uk	2	0000-0002-7006-7396		1	Wellcome Centre for Human Genetics	Nuffield Department of Medicine
Zhichao Ai	zhichao.ai@ndorms.ox.ac.uk	2			2	Kennedy Institute for Rheumatology	Nuffield Department of Orthopaedics, Rheumatology and Musculoskeletal Diseases
Mark Ainsworth	Mark.ainsworth@ouh.nhs.uk	19			3	MRC Weatherall Institute of Molecular Medicine
Chris Allan	chris.allan@well.ox.ac.uk	1			4	Big Data Institute	Nuffield Department of Medicine
Alice Allcock	alicea@well.ox.ac.uk	1			5	Target Discovery Institute	Nuffield Department of Medicine
Azim Ansari	azim.ansari@ndm.ox.ac.uk	1,6	0000-0003-2790-8353		6	Peter Medawar Building for Pathogen Research	Nuffield Department of Medicine
Carolina V Arancibia-Cárcamo	carolina.arancibia@ndm.ox.ac.uk	16, 18	0000-0003-1006-3630		7		Mathematical Institute
Dominik Aschenbrenner	dominik.aschenbrenner@ndm.ox.ac.uk	16			8	Oxford Vaccine Group	Department of Paediatrics
Moustafa Attar	moustafa.attar@kennedy.ox.ac.uk	1, 2	0000-0003-4116-1276		9		Department of Paediatrics
J. Kenneth Baillie	j.k.baillie@ed.ac.uk	28			10		Department of Oncology
Eleanor Barnes	ellie.barnes@ndm.ox.ac.uk	6,16,18,19	0000-0002-0860-0831		11		Department of Physics
Rachael Bashford-Rogers	rbr1@well.ox.ac.uk	1	0000-0002-6838-0711		12	Jenner Institute	Nuffield Department of Medicine
Archana Bashyal	archana.bashyal@ouh.nhs.uk	19			13	Botnar Research Centre	Nuffield Department of Orthopaedics, Rheumatology and Musculoskeletal Diseases
Sally Beer	sally.beer@ouh.nhs.uk	19	0000-0002-0988-3458		14		Nuffield Department of Clinical Neuroscience
Georgina Berridge	georgina.berridge@ ndm.ox.ac.uk	5			15		Department of Statistics
Amy Beveridge	amy.beveridge@paediatrics.ox.ac.uk	8			16	Translational Gastroenterology Unit
Sagida Bibi	sagida.bibi@paediatrics.ox.ac.uk	8			17	Chinese Academy of Medical Science Oxford Institute (COI)
Tihana Bicanic	tbicanic@sgul.ac.uk	33	0000-0002-2676-838X		18	NIHR Oxford Biomedical Research Centre
Luke Blackwell	luke.blackwell@paediatrics.ox.ac.uk	8			19	Oxford University Hospitals NHS Foundation Trust
Paul Bowness	paul.bowness@ndorms.ox.ac.uk	13, 18	0000-0003-4597-0484		20	Respiratory Medicine Unit	Nuffield Department of Medicine
Andrew Brent	andrew.brent@ndm.ox.ac.uk	19			21	Diamond Light Source
Andrew Brown	acbrown@well.ox.ac.uk	1			22	Centre for Medicines Discovery	Nuffield Department of Medicine
John Broxholme	johnb@well.ox.ac.uk	1			23	Center for Health Data Science
David Buck	david.buck@well.ox.ac.uk	1	0000-0001-9986-3874		24	Novo Nordisk Foundation Center for Protein Research
Katie L Burnham	kburnham@well.ox.ac.uk	27	0000-0001-8680-2933		25	MRC Human Immunology Unit	Radcliffe Department of Medicine
Helen Byrne	helen.byrne@maths.ox.ac.uk	7			26	MRC WIMM Centre for Computational Biology	Radcliffe Department of Medicine
Susana Camara	susana.camara@paediatrics.ox.ac.uk	8			27	Wellcome Sanger Institute
Ivan Candido Ferreira	ivan.candido-ferreira@sjc.ox.ac.uk	3	0000-0002-4916-4212		28		Genetics and Genomics, Roslin Institute
Philip Charles	philip.charles@ndm.ox.ac.uk	4,5	0000-0001-5278-5354		29	NIHR Health Protection Research Unit in Emerging and Zoonotic Infections	Institute of Infection, Veterinary and Ecological Sciences
Wentao Chen	wentao.chen@linacre.ox.ac.uk	20	0000-0003-1705-2299		30		Tropical and Infectious Diseases Unit
Yi-Ling Chen	yi-ling.chen@rdm.ox.ac.uk	3	0000-0003-3758-0638		31	Centre for Tropical Medicine and Global Health	Nuffield Department of Medicine
Amanda Chong	achong@well.ox.ac.uk	1	0000-0003-4919-2632		32	Experimental Medicine Division	Nuffield Department of Medicine
Elizabeth Clutterbuck	elizabeth.clutterbuck@paediatrics.ox.ac.uk	8			33		Institute for Infection and Immunity
Mark Coles	mark.coles@kennedy.ox.ac.uk	2	0000-0001-8079-9358		34		The William Harvey Research Institute, Barts and The London
Christopher P Conlon	chris.conlon@ndm.ox.ac.uk	17,19,31	0000-0002-3531-2464		35		Department of Physiology, Anatomy and Genetics
Richard Cornall	richard.cornall@ndm.ox.ac.uk	25			36		Medical Sciences Division
Adam P Cribbs	adam.cribbs@imm.ox.ac.uk	13	0000-0001-5288-3077
Fabiola Curion	curion@well.ox.ac.uk	1	0000-0003-2502-8803
Emma E Davenport	ed5@sanger.ac.uk	27	0000-0002-8768-346X
Neil Davidson	neil.davidson@ouh.nhs.uk	19
Simon Davis	simon.davis2@ndm.ox.ac.uk	5	0000-0001-7840-2411
Calliope Dendrou	cdendrou@well.ox.ac.uk	1	0000-0003-1179-4021
Julie Dequaire	julie.dequaire@pmb.ox.ac.uk	19
Lea Dib	lea.dib@kennedy.ox.ac.uk	2
James Docker	dockerjd@well.ox.ac.uk	1
Christina Dold	christina.dold@paediatrics.ox.ac.uk	8
Tao Dong	tao.dong@rdm.ox.ac.uk	17,25
Damien Downes	damien.downes@ndcls.ox.ac.uk	3
Alexander Drakesmith	alexander.drakesmith@imm.ox.ac.uk	3	https://orcid.org/0000-0002-8503-6103
Susanna J Dunachie	susie.dunachie@ndm.ox.ac.uk	6, 19, 25,31	0000-0001-5665-6293
David A Duncan	david.duncan@rdm.ox.ac.uk	3, 21	0000-0002-0827-2022
Chris Eijsbouts	chris.eijsbouts@merton.ox.ac.uk	1,4
Robert Esnouf	robert@strubi.ox.ac.uk	1, 4
Alexis Espinosa	alexis.espinosa@ouh.nhs.uk	19	0000-0002-5091-6768
Rachel Etherington	rachel.etherington@rdm.ox.ac.uk	3, 25
Benjamin Fairfax	benjamin.fairfax@oncology.ox.ac.uk	3,10,18,19	0000-0001-7413-5002
Rory Fairhead	rory.fairhead@pmb.ox.ac.uk	19
Hai Fang	hfang@well.ox.ac.uk	1	0000-0003-3961-8572
Shayan Fassih	shayan.fassih@worc.ox.ac.uk	19	0000-0003-2968-658X
Sally Felle	sally.felle@paediatrics.ox.ac.uk	8
Maria Fernandez Mendoza	maria.fernandezmendoza@ouh.nhs.uk	19
Ricardo C Ferreira	ricardof@well.ox.ac.uk	1	0000-0001-5733-3285
Roman Fischer	roman.fischer@ndm.ox.ac.uk	5	0000-0002-9715-5951
Thomas Foord	thomas.foord@stcatz.ox.ac.uk	19
Aden Forrow	aden.forrow@maths.ox.ac.uk	7	0000-0001-8316-5369
John Frater	john.frater@ndm.ox.ac.uk	6,19
Anastasia Fries	anastasia.fries@ndm.ox.ac.uk	19, 20	0000-0003-1609-5991
Veronica Gallardo Sanchez	veronica.sanchez@ouh.nhs.uk	19
Lucy C Garner	lucy.garner@imm.ox.ac.uk	3,16	0000-0002-6461-252X
Clementine Geeves	c.geeves@nhm.ac.uk	1
Dominique Georgiou	dominique.georgiou@ouh.nhs.uk	19
Leila Godfrey	leila.godfrey@well.ox.ac.uk	1
Tanya Golubchik	golubchi@well.ox.ac.uk	1,4	0000-0003-2765-9828
Maria Gomez Vazquez	maria.gomezvazquez@kennedy.ox.ac.uk	2
Angie Green	angieg@well.ox.ac.uk	1
Hong Harper	hong@well.ox.ac.uk	1
Heather A Harrington	heather.harrington@maths.ox.ac.uk	7
Raphael Heilig	raphael.heilig@ndm.ox.ac.uk	5
Svenja Hester	svenja.hester@ndm.ox.ac.uk	5
Jennifer Hill	jennifer.hill@paediatrics.ox.ac.uk	8
Charles Hinds	c.j.hinds@qmul.ac.uk	34
Clare Hird	clare.hird@ouh.nhs.uk	19
Ling-Pei Ho	ling-pei.ho@imm.ox.ac.uk	20,25
Renee Hoekzema	renee.hoekzema@maths.ox.ac.uk	7
Benjamin Hollis	benjamin.hollis@kennedy.ox.ac.uk	12
Jim Hughes	jim.hughes@imm.ox.ac.uk	25,26	0000-0002-8955-7256
Paula Hutton	paula.hutton@ouh.nhs.uk	19
Matthew Jackson	mattjackson4@gmail.com	2	0000-0002-7891-6217
Ashwin Jainarayanan	ashwin.jainarayanan@exeter.ox.ac.uk	2	0000-0003-3523-1477
Anna James-Bott	anna.james-bott@st-hildas.ox.ac.uk	13	0000-0001-9658-5354
Kathrin Jansen	kathrin.jansen@kennedy.ox.ac.uk	2	0000-0002-3803-7680
Katie Jeffery	katie.jeffery@ouh.nhs.uk	19	0000-0002-6506-2689
Elizabeth Jones	elizabeth.jones@paediatrics.ox.ac.uk	8
Luke Jostins	luke.jostins@kennedy.ox.ac.uk	2,4
Georgina Kerr	georgina.kerr@medsci.ox.ac.uk	36
David Kim	david.kim@chch.ox.ac.uk	19	0000-0002-4345-661X
Paul Klenerman	paul.klenerman@medawar.ox.ac.uk	6, 16	0000-0003-4307-9161
Julian C. Knight	julian.knight@well.ox.ac.uk	1,17,18,19	0000-0002-0377-5536
Vinod Kumar	vinod.kumar@kennedy.ox.ac.uk	2
Piyush Kumar Sharma	piyush.kumarsharma@spc.ox.ac.uk	3,10	0000-0002-6247-3503
Prathiba Kurupati	prathiba.kurupati@rdm.ox.ac.uk	3, 25
Andrew Kwok	ajkwok@well.ox.ac.uk	1	0000-0001-8928-5054
Angela Lee	angela.lee@well.ox.ac.uk	1	0000-0002-7591-825X
Aline Linder	aline.linder@paediatrics.ox.ac.uk	8
Teresa Lockett	teresa.lockett@ouh.nhs.uk	19
Lorne Lonie	lorne@well.ox.ac.uk	1
Maria Lopopolo	maria.lopopolo@pasteur.fr	1
Martyna Lukoseviciute	martyna.lukoseviciute@ndcls.ox.ac.uk	3	0000-0002-8915-5249
Jian Luo	jian.luo@ndm.ox.ac.uk	20
Spyridoula Marinou	spyridoula.marinou@paediatrics.ox.ac.uk	8
Brian Marsden	brian.marsden@kennedy.ox.ac.uk	2,22	0000-0002-1937-4091
Jose Martinez	Jose.martinez@ouh.nhs.uk	19
Philippa Matthews	philippa.matthews@ndm.ox.ac.uk	6
Michalina Mazurczyk	michalina.mazurczyk@rdm.ox.ac.uk	3, 25
Simon McGowan	simon.mcgowan@imm.ox.ac.uk	3	0000-0001-9720-1914
Stuart McKechnie	stuart.mckechnie@ouh.nhs.uk	19
Adam Mead	adam.mead@imm.ox.ac.uk	3, 18, 19	0000-0001-8522-1002
Alexander J Mentzer	alexander.mentzer@ndm.ox.ac.uk	1,19	0000-0002-4502-2209
Yuxin Mi	yuxin@well.ox.ac.uk	1	0000-0002-8194-2977
Claudia Monaco	claudia.monaco@kennedy.ox.ac.uk	2	0000-0003-1985-4914
Ruddy Montadon	rm@well.ox.ac.uk	1
Giorgio Napolitani	giorgio.napolitani@rdm.ox.ac.uk	3, 25	0000-0002-3605-6394
Isar Nassiri	isar.nassiri@oncology.ox.ac.uk	3, 10	0000-0003-1886-1151
Alex Novak	alex.novak@ouh.nhs.uk	19
Darragh O'Brien	darragh.obrien@ndm.ox.ac.uk	5
Daniel O'Connor	daniel.oconnor@paediatrics.ox.ac.uk	8,18	0000-0002-6902-9886
Denise O'Donnell	deniseo'donnell@nhs.net	19
Graham Ogg	graham.ogg@ndm.ox.ac.uk	3, 18, 25
Lauren Overend	lauren.overend@oriel.ox.ac.uk	1	0000-0002-2802-048X
Inhye Park	inhye.park@kennedy.ox.ac.uk	2
Ian Pavord	ian.pavord@ndm.ox.ac.uk	20
Yanchun Peng	yanchun.peng@imm.ox.ac.uk	3,17, 25
Frank Penkava	frank.penkava@ndorms.ox.ac.uk	13	0000-0001-9163-8576
Mariana Pereira Pinho	mariana.pereirapinho@rdm.ox.ac.uk	3, 25	0000-0002-5759-2436
Elena Perez	elena.perez@ouh.nhs.uk	19
Andrew J Pollard	andrew.pollard@paediatrics.ox.ac.uk	8
Fiona Powrie	fiona.powrie@kennedy.ox.ac.uk	2
Bethan Psaila	bethan.psaila@ndcls.ox.ac.uk	3, 18	0000-0001-8198-9663
T. Phuong Quan	phuong.quan@ndm.ox.ac.uk	32	0000-0001-8566-1817
Emmanouela Repapi	emmanouela.repapi@ndcls.ox.ac.uk	3, 26	0000-0001-8085-0731
Santiago Revale	santiago.revale@well.ox.ac.uk	1	0000-0001-5219-9582
Laura Silva-Reyes	laura.silvareyes@paediatrics.ox.ac.uk	8
Jean-Baptiste Richard	jean-baptiste.richard@new.ox.ac.uk	2, 3	0000-0002-4052-9772
Charlotte Rich-Griffin	charlotte.rich@well.ox.ac.uk	1	0000-0001-8212-9542
Thomas Ritter	thomas.ritter@sjc.ox.ac.uk	19	0000-0002-3153-342X
Christine S Rollier	christine.rollier@paediatrics.ox.ac.uk	8	0000-0002-9712-8080
Matthew Rowland	matthew.rowland@ndcn.ox.ac.uk	19
Fabian Ruehle	fabian.ruehle@physics.ox.ac.uk	11	0000-0002-8409-9823
Mariolina Salio	mariolina.salio@imm.ox.ac.uk	3, 25	0000-0002-4821-3801
Stephen Nicholas Sansom	stephen.sansom@kennedy.ox.ac.uk	2	0000-0003-4569-8513
Alberto Santos Delgado	alberto.santosdelgado@bdi.ox.ac.uk	4,23,24	0000-0002-9163-7730
Tatjana Sauka-Spengler	tatjana.sauka-spengler@imm.ox.ac.uk	3
Ron Schwessinger	ron.schwessinger@msdtc.ox.ac.uk	3
Giuseppe Scozzafava	giuseppe@well.ox.ac.uk	1
Gavin Screaton	gavin.screaton@medsci.ox.ac.uk	36
Anna Seigal	seigal@maths.ox.ac.uk	7
Malcolm G Semple	m.g.semple@liverpool.ac.uk	29	0000-0001-9700-0418
Martin Sergeant	martin.sergeant@ndcls.ox.ac.uk	3	0000-0001-7264-2668
Christina Simoglou Karali	christina.simogloukarali@ndcls.ox.ac.uk	3	0000-0003-2169-6580
David Sims	david.sims@imm.ox.ac.uk	3
Donal Skelly	donal.skelly@ndcn.ox.ac.uk	6,14,19	0000-0002-2426-3097
Hubert Slawinski	hubert.slawinski@well.ox.ac.uk	1	0000-0002-8996-8477
Alberto Sobrinodiaz	alberto.sobrinodiaz@ouh.nhs.uk	19
Nikolaos Sousos	nikolaos.sousos@ndcls.ox.ac.uk	3, 18, 19	0000-0002-9100-2954
Lizzie Stafford	lizzie.stafford@ouh.nhs.uk	19
Lisa Stockdale	lisa.stockdale@paediatrics.ox.ac.uk	8
Marie Strickland	marie.strickland@ndcls.ox.ac.uk	3
Otto Sumray	osumray@gmail.com	7,
Bo Sun	bo.sun@ndcn.ox.ac.uk	1	0000-0002-5507-6657
Chelsea A Taylor	chelsea.taylor@oncology.ox.ac.uk	3,10	0000-0002-1635-4167
Stephen Taylor	stephen.taylor@imm.ox.ac.uk	3	0000-0002-3559-4334
Adan Taylor	adan.taylor@gtc.ox.ac.uk	19
Supat Thongjuea	supat.thongjuea@ndcls.ox.ac.uk	3	0000-0002-9129-4694
Hannah Thraves	hannah.thraves@ouh.nhs.uk	19
John A Todd	jatodd@well.ox.ac.uk	1	0000-0003-2740-8148
Adriana Tomic	adriana.tomic@paediatrics.ox.ac.uk	8	0000-0001-9885-3535
Orion Tong	orion.tong@seh.ox.ac.uk	3, 10	0000-0002-0659-5944
Amy Trebes	amy.trebes@well.ox.ac.uk	1	0000-0002-3715-9109
Dominik Trzupek	dominik.trzupek@well.ox.ac.uk	1
Felicia Anna Tucci	felicia.tucci@well.ox.ac.uk	1	0000-0001-5813-9708
Lance Turtle	lance.Turtle@liverpool.ac.uk	30	0000-0002-0778-1693
Irina Udalova	irina.udalova@kennedy.ox.ac.uk	2
Holm Uhlig	holm.uhlig@ndm.ox.ac.uk	16, 19
Erinke van Grinsven	erinke.vangrinsven@kennedy.ox.ac.uk	2
Iolanda Vendrell	iolanda.vendrell@ndm.ox.ac.uk	5	0000-0001-7187-4061
Marije Verheul	marije.verheul@paediatrics.ox.ac.uk	8
Alexandru Voda	alexandru.voda@seh.ox.ac.uk	2
Guanlin Wang	guanlin.wang@imm.ox.ac.uk	3	0000-0002-5622-3890
Lihui Wang	lihui.wang@kennedy.ox.ac.uk	2
Dapeng Wang	dapeng@well.ox.ac.uk	1	0000-0002-9925-4574
Peter Watkinson	peter.watkinson@ndcn.ox.ac.uk	14, 19
Robert A Watson	robert.watson@oncology.ox.ac.uk	3,10,19	0000-0002-8838-9406
Michael Weinberger	michael.weinberger@dpag.ox.ac.uk	3, 35	0000-0001-8235-6825
Justin Whalley	jpw@well.ox.ac.uk	1	0000-0002-0403-3091
Lorna Witty	lorna@well.ox.ac.uk	1
Katherine Wray	katherine.wray@rdm.ox.ac.uk	3, 19
Luzheng Xue	luzheng.xue@ndm.ox.ac.uk	20	0000-0003-0042-1262
Hing Yuen Yeung	yhyvic@well.ox.ac.uk	1	0000-0002-2353-7076
Zixi Yin	zixi.yin@ndm.ox.ac.uk	17,25
Rebecca K Young	rebecca.young@oriel.ox.ac.uk	19
Jonathan Youngs	jyoungs@sgul.ac.uk	33
Ping Zhang	ping.zhang@well.ox.ac.uk	1
Yasemin-Xiomara Zurke	yasemin-xiomara.zurke@seh.ox.ac.uk	2	0000-0002-3473-7129
