# Supplementary material for: Immunodominant NP105-113-B*0702 cytotoxic T cell response controls viral replication and is associated with less severe COVID-19 disease
Source: Research Square preprint supplement (doi:10.21203/rs.3.rs-734011/v1), 2021-07-27
Supplement: Supplementary file 8 [file abfb372a8fc65c7fa87df5ca.docx]

**SUPPLEMENTARY MATERIALS**

**
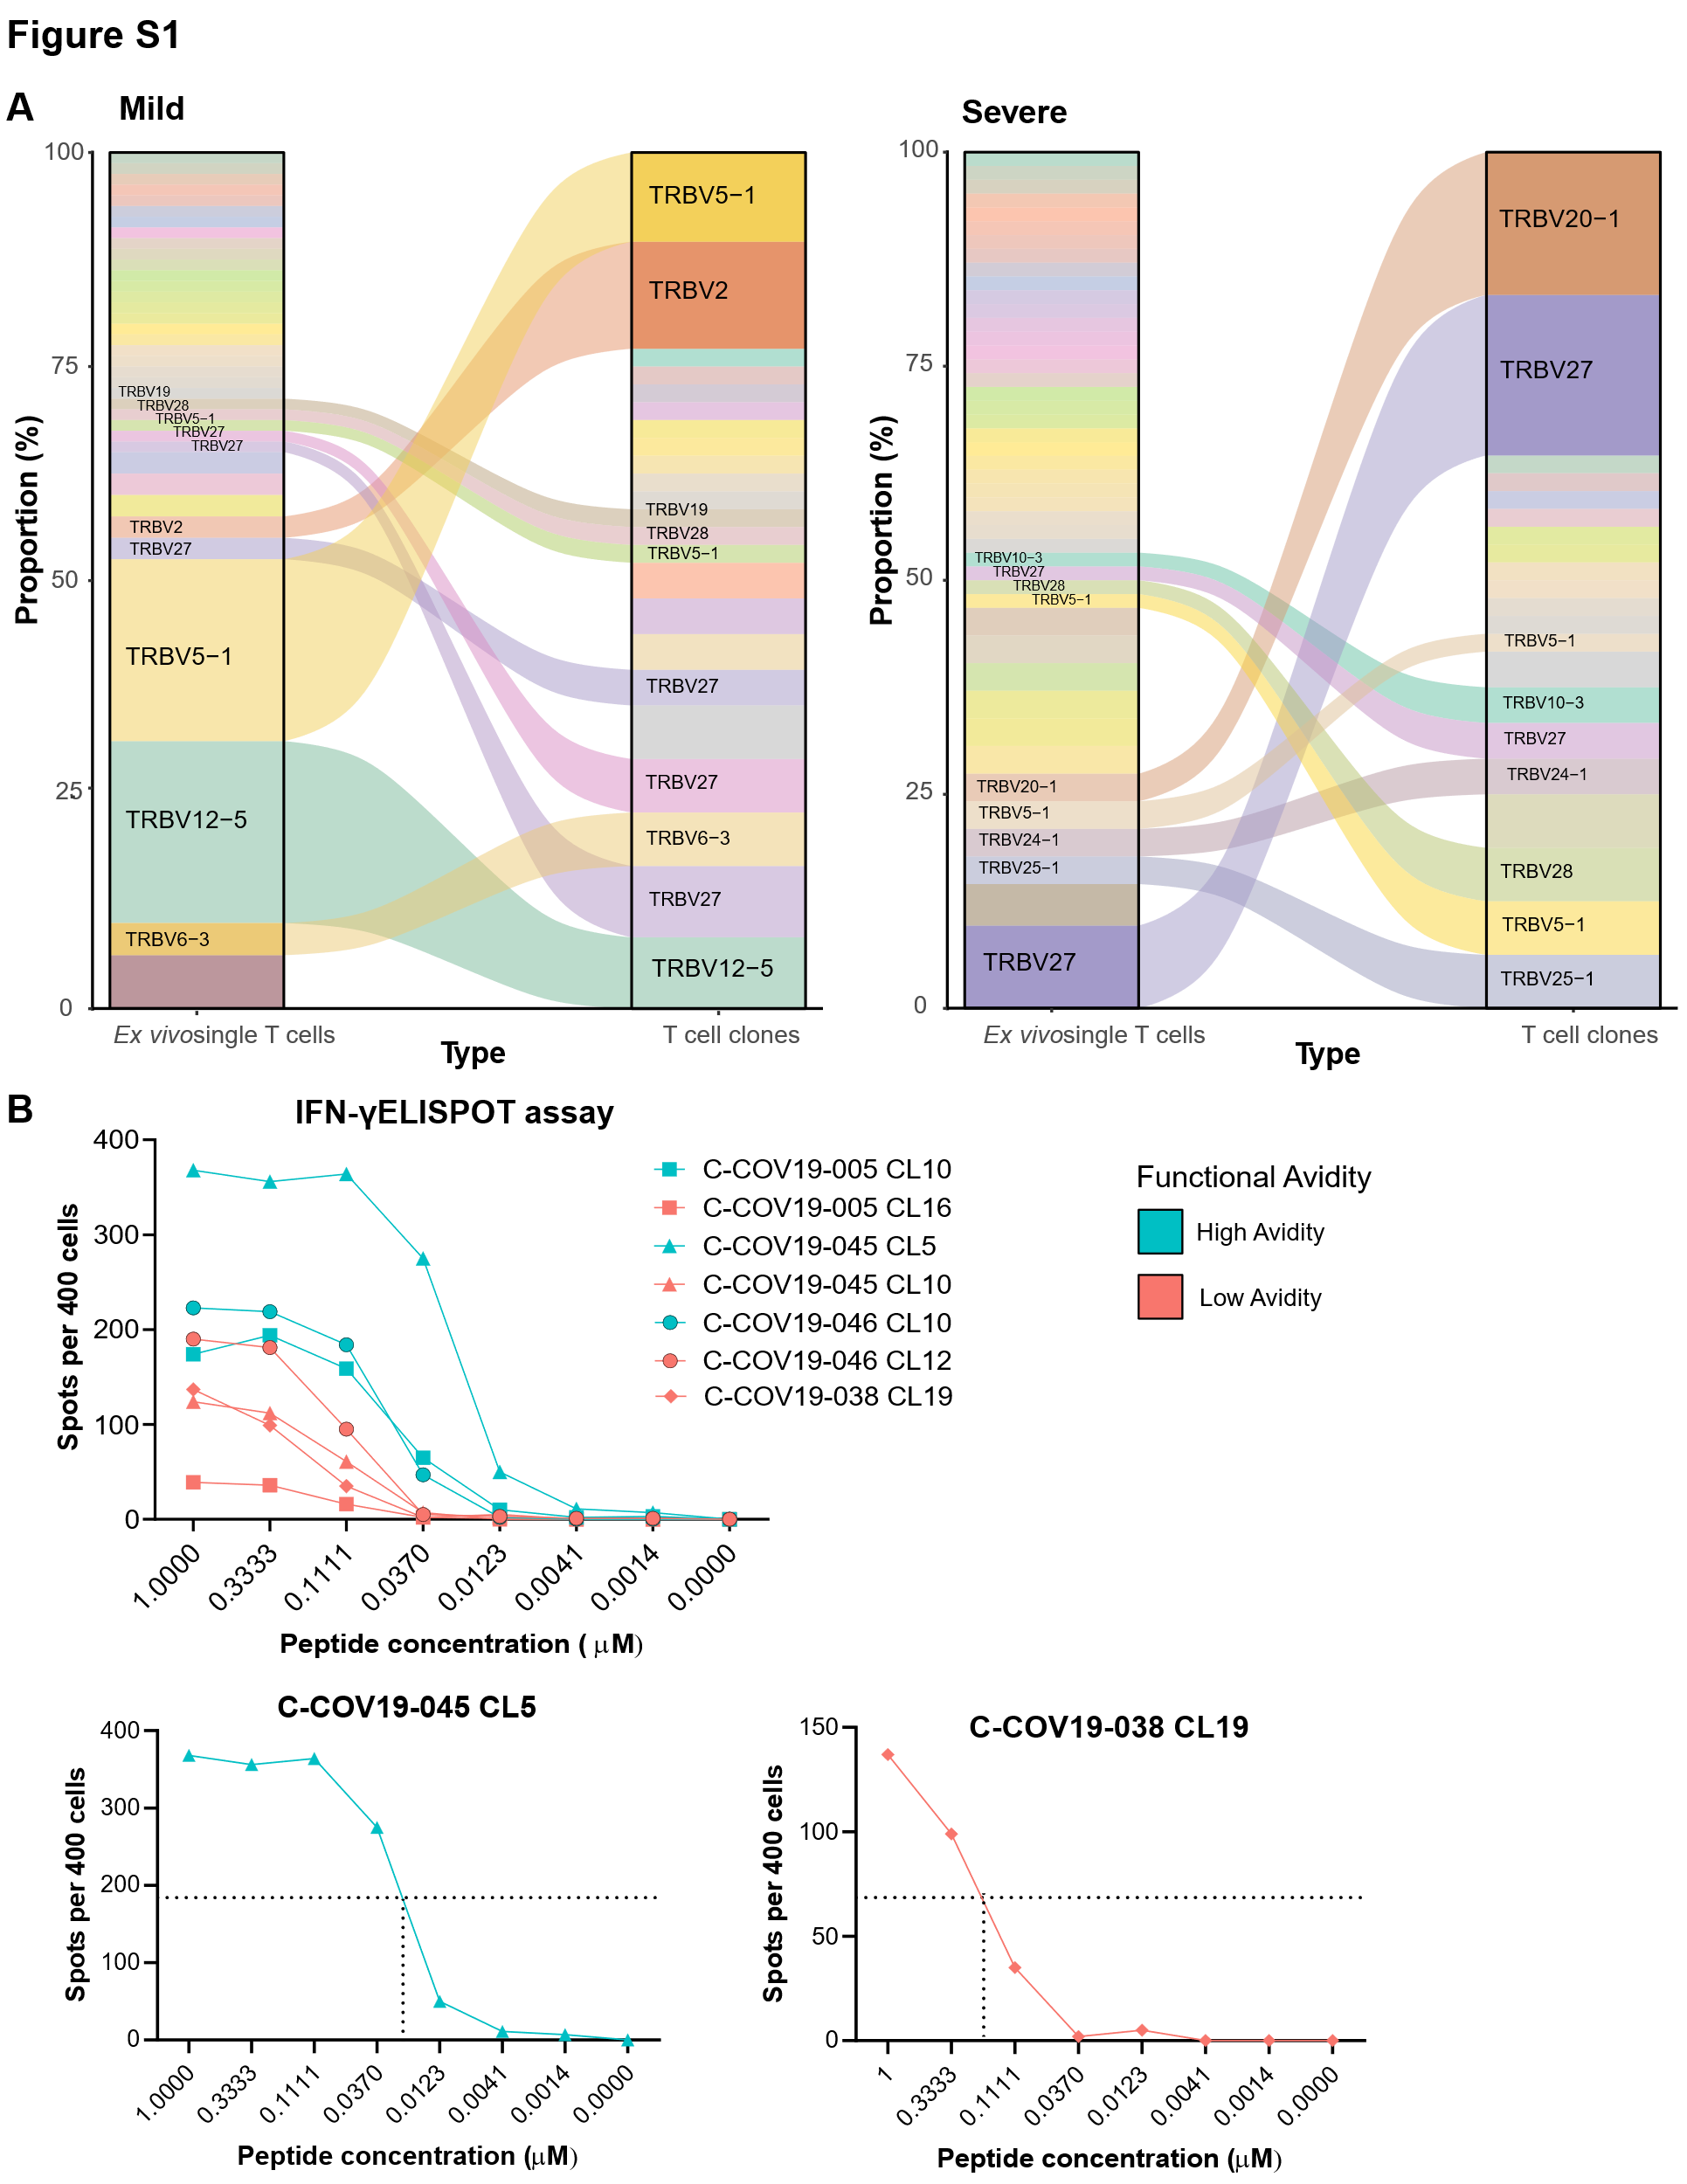
**

**Figure S1. TCR clonotypes for single cells and T cell clones and EC50 derivation.** (A)Flow diagrams to show T cell clonotypes (defined as TRBV gene usage and CDR3β sequence) between SmartSeq2 sequenced *ex vivo* single cells *(ex vivo* single T cells column) and bulk TCR sequenced T cell clones grown *in vitro* culture (T cell clones column). Panel on the left shows grouped TCRs from patients with mild disease, panel on the right for patients with severe disease. (B) Upper panel: IFN-γ ELISPOT assay for representative high and low functional avidity clones for each patient in blue and red respectively (C-COV19-038 only has low functional avidity clone shown). Lower panels: high functional avidity clone from C-COV19-45 and low functional avidity clone from C-COV-038 with example of EC50 derivation.

**Figure S2. FACS gating strategy and peptide titration.** (A) Gating strategy for flow cytometric analyses. (B) Nucleoprotein peptide titration at varying concentrations for ICS for MIP1β and CD107a. Representative flow cytometry plots shown (from single T cell clone).

**Figure S3.** **T cell response six months post infection to NP Vaccinia virus.** Representative ICS flow cytometry plots showing MIP1β and CD107a protein expression after incubation with NP-expressing Vaccinia virus in three patient-derived bulk T cell lines from six months convalescent PBMC samples.

**Table S1.**Genes used for gene module scoring in single cell expression analysis.

| **Cytotoxicity** | **Inhibitory receptors** |
| --- | --- |
| GZMA | KLRC1 |
| GZMB | PDCD1 |
| GZMH | CD200R1 |
| GZMK | LAG3 |
| PRF1 | HAVCR2 |
| GNLY | CD160 |
| NKG7 | CTLA4 |
|  | BTLA |
|  | TIGIT |

**Table S2.**αβ VJ gene usage and CDR3 sequences for *ex vivo* single cell TCR sequencing.

**Table S3.**αβ VJ gene usage and CDR3 sequences from bulk TCR sequencing of T cell clones.

**Table S4.**EC50 values from selected T cell clones.

**Table S5.**COvid-19 Multi-omics Blood ATlas (COMBAT) Consortium.
