# Supplementary material for: Immunodominant NP105-113-B*0702 cytotoxic T cell response controls viral replication and is associated with less severe COVID-19 disease
Source: Research Square preprint supplement (doi:10.21203/rs.3.rs-734011/v1), 2021-07-27
Supplement: Supplementary file 9 [file d89fb8e90b473beca250b792.xlsx]

## Sheet: Sheet1
All single β					Paired αβ (1/2α + 1β)
Patient	TRBV	TRBJ	CDR3β	Severity	Patient	TRAV	TRAJ	CDR3α	TRBV	TRBJ	CDR3β	Severity
C-COV19-005	TRBV27	TRBJ2-5	CASSPLVGERFRKETQYF	Mild	C-COV19-005	TRAV12-2	TRAJ40	CAVTLTSGTYKYIF	TRBV27	TRBJ2-5	CASSPLVGERFRKETQYF	Mild
C-COV19-005	TRBV2	TRBJ2-1	CASSVLPGPPRGEQFF	Mild	C-COV19-005	TRAV8-3	TRAJ5	CAVVTDTGRRALTF	TRBV2	TRBJ2-1	CASSVLPGPPRGEQFF	Mild
C-COV19-005	TRBV12-5	TRBJ2-5	CASGPATSAEQETQYF	Mild	C-COV19-005	TRAV8-3	TRAJ5	CAVVTDTGRRALTF	TRBV2	TRBJ2-1	CASSVLPGPPRGEQFF	Mild
C-COV19-005	TRBV12-5	TRBJ2-5	CASGPATSAEQETQYF	Mild	C-COV19-005	TRAV12-3	TRAJ34	CAIPPLPGKLIF	TRBV12-5	TRBJ2-5	CASGPATSAEQETQYF	Mild
C-COV19-005	TRBV12-5	TRBJ2-5	CASGPATSAEQETQYF	Mild	C-COV19-005	TRAV21	TRAJ43	CAAPYNNNDMRF	TRBV6-3	TRBJ1-6	CASSYLPAGSSYNSPLHF	Mild
C-COV19-005	TRBV6-3	TRBJ1-6	CASSYLPAGSSYNSPLHF	Mild	C-COV19-005	TRAV12-3	TRAJ34	CAIPPLPGKLIF	TRBV5-1	TRBJ1-1	CASSLAGSFMNTEAFF	Mild
C-COV19-005	TRBV5-1	TRBJ1-1	CASSLAGSFMNTEAFF	Mild	C-COV19-005	TRAV12-3	TRAJ34	CVIPPLPGKLIF	TRBV5-1	TRBJ1-1	CASSLAGSFMNTEAFF	Mild
C-COV19-005	TRBV12-5	TRBJ2-5	CASGPATSAEQETQYF	Mild	C-COV19-005	TRAV12-3	TRAJ34	CAIPPLPGKLIF	TRBV12-5	TRBJ2-5	CASGPATSAEQETQYF	Mild
C-COV19-005	TRBV12-5	TRBJ2-5	CASGPATSAEQETQYF	Mild	C-COV19-005	TRAV12-3	TRAJ34	CAIPPLPGKLIF	TRBV12-5	TRBJ2-5	CASGPATSAEQETQYF	Mild
C-COV19-005	TRBV27	TRBJ2-1	CASSSLLAGGFYEQFF	Mild	C-COV19-005	TRAV12-3	TRAJ34	CAIPPLPGKLIF	TRBV12-5	TRBJ2-5	CASGPATSAEQETQYF	Mild
C-COV19-005	TRBV28	TRBJ2-2	CASSRLTGSTGELFF	Mild	C-COV19-005	TRAV10	TRAJ29	CVVSEGNTPLVF	TRBV5-1	TRBJ1-2	CASSLAGAGYTF	Mild
C-COV19-005	TRBV27	TRBJ2-5	CASSPLTGSAERKETQYF	Mild	C-COV19-005	TRAV21	TRAJ37	CAVLDTGKLIF	TRBV5-1	TRBJ1-2	CASSLAGAGYTF	Mild
C-COV19-005	TRBV12-5	TRBJ2-5	CASGPATSAEQETQYF	Mild	C-COV19-005	TRAV13-2	TRAJ8	CAENGGFQKLVF	TRBV20-1	TRBJ1-6	CSARDTGVQSFYSPLHF	Mild
C-COV19-005	TRBV12-5	TRBJ2-5	CASGPATSAEQETQYF	Mild	C-COV19-005	TRAV12-3	TRAJ34	CAIPPLPGKLIF	TRBV12-5	TRBJ2-5	CASGPATSAEQETQYF	Mild
C-COV19-005	TRBV5-1	TRBJ1-2	CASSLAGAGYTF	Mild	C-COV19-005	TRAV12-3	TRAJ34	CAIPPLPGKLIF	TRBV12-5	TRBJ2-5	CASGPATSAEQETQYF	Mild
C-COV19-005	TRBV20-1	TRBJ1-6	CSARDTGVQSFYSPLHF	Mild	C-COV19-005	TRAV12-3	TRAJ34	CAIPPLPGKLIF	TRBV12-5	TRBJ2-5	CASGPATSAEQETQYF	Mild
C-COV19-005	TRBV27	TRBJ2-5	CASSPLTGSAERKETQYF	Mild	C-COV19-005	TRAV12-3	TRAJ34	CAIPPLPGKLIF	TRBV12-5	TRBJ2-5	CASGPATSAEQETQYF	Mild
C-COV19-005	TRBV12-5	TRBJ2-5	CASGPATSAEQETQYF	Mild	C-COV19-005	TRAV12-3	TRAJ34	CAIPPLPGKLIF	TRBV12-5	TRBJ2-5	CASGPATSAEQETQYF	Mild
C-COV19-005	TRBV12-5	TRBJ2-5	CASGPATSAEQETQYF	Mild	C-COV19-005	TRAV12-3	TRAJ34	CAIPPLPGKLIF	TRBV12-5	TRBJ2-5	CASGPATSAEQETQYF	Mild
C-COV19-005	TRBV12-5	TRBJ2-5	CASGPATSAEQETQYF	Mild	C-COV19-005	TRAV12-3	TRAJ34	CAIPPLPGKLIF	TRBV12-5	TRBJ2-5	CASGPATSAEQETQYF	Mild
C-COV19-005	TRBV5-1	TRBJ2-1	CASSLAGGPYNEQFF	Mild	C-COV19-005	TRAV12-3	TRAJ34	CAIPPLPGKLIF	TRBV12-5	TRBJ2-5	CASGPATSAEQETQYF	Mild
C-COV19-005	TRBV6-3	TRBJ1-6	CASSYLPAGSSYNSPLHF	Mild	C-COV19-005	TRAV21	TRAJ31	CAVLNNARLMF	TRBV5-1	TRBJ1-1	CASSLAGAEAFF	Mild
C-COV19-005	TRBV19	TRBJ1-5	CASSILQGLGGSNQPQHF	Mild	C-COV19-005	TRAV21	TRAJ43	CAAPYNNNDMRF	TRBV6-5	TRBJ1-6	CASSYLPAGSSYNSPLHF	Mild
C-COV19-005	TRBV5-1	TRBJ1-2	CASSLAGAYGYTF	Mild	C-COV19-005	TRAV12-3	TRAJ34	CAIPPLPGKLIF	TRBV12-5	TRBJ2-5	CASGPATSAEQETQYF	Mild
C-COV19-005	TRBV12-5	TRBJ2-5	CASGPATSAEQETQYF	Mild	C-COV19-005	TRAV8-3	TRAJ3	CAVPLYSSASKIIF	TRBV15	TRBJ2-1	CATSSFTGGVYNEQFF	Mild
C-COV19-005	TRBV2	TRBJ1-1	CASSERTGGSTEAFF	Mild	C-COV19-005	TRAV8-4	TRAJ3	CAVPLYSSASKIIF	TRBV15	TRBJ2-1	CATSSFTGGVYNEQFF	Mild
C-COV19-005	TRBV12-5	TRBJ2-5	CASGPATSAEQETQYF	Mild	C-COV19-045	TRAV8-3	TRAJ9	CAVGPLDTGGFKTIF	TRBV28	TRBJ1-2	CASTRTGTVAYGYTF	Severe
C-COV19-005	TRBV4-1	TRBJ2-7	CASSQDPAYEQYF	Mild	C-COV19-045	TRAV26-2	TRAJ41	CILRDPNSGYALNF	TRBV19	TRBJ1-6	CATSRAESFNSPLHF	Severe
C-COV19-005	TRBV12-5	TRBJ2-5	CASGPATSAEQETQYF	Mild	C-COV19-045	TRAV5	TRAJ9	CAERGGGFKTIF	TRBV5-1	TRBJ2-3	CASSAREGPSDTQYF	Severe
C-COV19-005	TRBV12-5	TRBJ2-5	CASGPATSAEQETQYF	Mild	C-COV19-045	TRAV21	TRAJ31	CAVLNNARLMF	TRBV5-1	TRBJ1-1	CASSLAGAEAFF	Severe
C-COV19-005	TRBV2	TRBJ2-1	CASSVLPGPPRGEQFF	Mild	C-COV19-045	TRAV3	TRAJ20	CAVRPPNDYKLSF	TRBV7-6	TRBJ2-1	CASSPWGRSSYNEQFF	Severe
C-COV19-005	TRBV12-5	TRBJ2-5	CASGPATSAEQETQYF	Mild	C-COV19-045	TRAV13-1	TRAJ4	CAASMAGGYNKLIF	TRBV25-1	TRBJ2-3	CASSGLTSLADTQYF	Severe
C-COV19-005	TRBV5-1	TRBJ1-1	CASSLAGAEAFF	Mild	C-COV19-045	TRAV1-1	TRAJ17	CAGGTKAAGNKLTF	TRBV25-1	TRBJ2-3	CASSGLTSLADTQYF	Severe
C-COV19-005	TRBV6-5	TRBJ1-6	CASSYLPAGSSYNSPLHF	Mild	C-COV19-045	TRAV13-1	TRAJ4	CAASMAGGYNKLIF	TRBV25-1	TRBJ2-3	CASSGLTSLADTQYF	Severe
C-COV19-005	TRBV12-5	TRBJ2-5	CASGPATSAEQETQYF	Mild	C-COV19-045	TRAV12-3	TRAJ3	CATDSSASKIIF	TRBV5-1	TRBJ1-5	CASSLAGGVYQPQHF	Severe
C-COV19-005	TRBV6-3	TRBJ1-6	CASSYLPAGSSYNSPLHF	Mild	C-COV19-045	TRAV5	TRAJ9	CAERGGGFKTIF	TRBV5-1	TRBJ2-1	CASSLREAPYNEQFF	Severe
C-COV19-005	TRBV5-1	TRBJ2-7	CASSLAGAYEQYF	Mild	C-COV19-045	TRAV21	TRAJ30	CAVPIKNRDDKIIF	TRBV27	TRBJ2-4	CASSPIAGGRKNIQYF	Severe
C-COV19-005	TRBV12-5	TRBJ2-5	CASGPATSAEQETQYF	Mild	C-COV19-045	TRAV12-1	TRAJ43	CVVKRRSDMRF	TRBV5-1	TRBJ2-1	CASSLAGGDEQFF	Severe
C-COV19-005	TRBV15	TRBJ2-1	CATSSFTGGVYNEQFF	Mild	C-COV19-045	TRAV8-3	TRAJ4	CAVGAPDSGGYNKLIF	TRBV27	TRBJ2-4	CASRGLTGPRGVKNIQYF	Severe
C-COV19-045	TRBV5-1	TRBJ2-7	CASSLAGIGLAF	Severe	C-COV19-045	TRAV8-7	TRAJ4	CAVGAPDSGGYNKLIF	TRBV27	TRBJ2-4	CASRGLTGPRGVKNIQYF	Severe
C-COV19-045	TRBV27	TRBJ2-7	CASSSLTSSRYEQYF	Severe	C-COV19-045	TRAV12-1	TRAJ28	CVVRDPKGAGSYQLTF	TRBV20-1	TRBJ2-7	CSARERYYEQYF	Severe
C-COV19-045	TRBV28	TRBJ1-2	CASTRTGTVAYGYTF	Severe	C-COV19-045	TRAV17	TRAJ22	CATVSFSGSARQLTF	TRBV28	TRBJ2-1	CASSTLNKGGWDEQFF	Severe
C-COV19-045	TRBV19	TRBJ1-6	CATSRAESFNSPLHF	Severe	C-COV19-045	TRAV12-2	TRAJ53	CAVKEGGSNYKLTF	TRBV5-1	TRBJ2-5	CASSRAGGPQETQYF	Severe
C-COV19-045	TRBV5-1	TRBJ1-5	CASSLAGGVYQPQHF	Severe	C-COV19-045	TRAV35	TRAJ42	CAGLNYGGSQGNLIF	TRBV12-3	TRBJ1-2	CASSSRGGSIYGYTF	Severe
C-COV19-045	TRBV27	TRBJ2-4	CASSLLTGLAKNIQYF	Severe	C-COV19-045	TRAV12-2	TRAJ53	CAVKEGGSNYKLTF	TRBV5-1	TRBJ2-5	CASSRAGGPQETQYF	Severe
C-COV19-045	TRBV5-1	TRBJ2-3	CASSAREGPSDTQYF	Severe	C-COV19-038	TRAV12-2	TRAJ42	CAVGGYGGSQGNLIF	TRBV5-1	TRBJ1-6	CASSLAGISLDNSPLHF	Severe
C-COV19-045	TRBV15	TRBJ1-4	CATSRRGVATTNEKLFF	Severe	C-COV19-038	TRAV21	TRAJ42	CAVGGYGGSQGNLIF	TRBV5-1	TRBJ1-6	CASSLAGISLDNSPLHF	Severe
C-COV19-045	TRBV5-1	TRBJ1-1	CASSLAGAEAFF	Severe	C-COV19-038	TRAV20	TRAJ44	CAVQASGTASKLTF	TRBV5-1	TRBJ2-2	CASSLAGAGELFF	Severe
C-COV19-045	TRBV5-1	TRBJ2-2	CASSLAGAGELFF	Severe	C-COV19-038	TRAV20	TRAJ44	CAVQASGTASKLTF	TRBV5-1	TRBJ2-2	CASSLAGAGELFF	Severe
C-COV19-045	TRBV28	TRBJ1-1	CASSLYKAEAFF	Severe	C-COV19-038	TRAV21	TRAJ23	CAAPERNQGGKLIF	TRBV27	TRBJ2-4	CASSLITGGAKNIQYF	Severe
C-COV19-045	TRBV7-6	TRBJ2-1	CASSPWGRSSYNEQFF	Severe	C-COV19-038	TRAV41	TRAJ58	CAAGPSSGSRLTF	TRBV5-1	TRBJ1-2	CASSLAGVGYTF	Severe
C-COV19-045	TRBV25-1	TRBJ2-3	CASSGLTSLADTQYF	Severe	C-COV19-038	TRAV12-3	TRAJ13	CAMTKERGGYQKVTF	TRBV24-1	TRBJ2-1	CATSDLVTSGDEQFF	Severe
C-COV19-045	TRBV5-1	TRBJ2-5	CASSRAGGPQETQYF	Severe	C-COV19-038	TRAV29DV5	TRAJ10	CAASHPPRDTGGGNKLTF	TRBV24-1	TRBJ2-1	CATSDLVTSGDEQFF	Severe
C-COV19-045	TRBV28	TRBJ2-1	CASSTLNKGGWDEQFF	Severe	C-COV19-038	TRAV21	TRAJ23	CAAPERNQGGKLIF	TRBV27	TRBJ2-4	CASSLITGGAKNIQYF	Severe
C-COV19-045	TRBV25-1	TRBJ2-3	CASSGLTSLADTQYF	Severe	C-COV19-038	TRAV12-3	TRAJ4	CAMSANSGGYNKLIF	TRBV24-1	TRBJ2-3	CATSDLATSAADTQYF	Severe
C-COV19-045	TRBV5-1	TRBJ1-5	CASSLAGGVYQPQHF	Severe	C-COV19-038	TRAV6	TRAJ4	CAMSANSGGYNKLIF	TRBV24-1	TRBJ2-3	CATSDLATSAADTQYF	Severe
C-COV19-045	TRBV5-1	TRBJ2-1	CASSLREAPYNEQFF	Severe	C-COV19-038	TRAV13-1	TRAJ11	CAASALGGYSTLTF	TRBV24-1	TRBJ1-2	CATSDLPGKDGYTF	Severe
C-COV19-045	TRBV27	TRBJ2-4	CASSPIAGGRKNIQYF	Severe	C-COV19-038	TRAV21	TRAJ23	CAAPERNQGGKLIF	TRBV27	TRBJ2-4	CASSLITGGAKNIQYF	Severe
C-COV19-045	TRBV20-1	TRBJ1-6	CSAQVGGNYNSPLHF	Severe	C-COV19-038	TRAV12-2	TRAJ6	CAMNGAGGSYIPTF	TRBV27	TRBJ2-7	CASSTNMNEQYF	Severe
C-COV19-045	TRBV5-1	TRBJ2-1	CASSLAGGDEQFF	Severe	C-COV19-038	TRAV12-2	TRAJ6	CAVNGAGGSYIPTF	TRBV27	TRBJ2-7	CASSTNMNEQYF	Severe
C-COV19-045	TRBV13	TRBJ2-4	CASSPIAGGRKNIQYF	Severe	C-COV19-038	TRAV41	TRAJ58	CAAGPSSGSRLTF	TRBV5-1	TRBJ1-2	CASSLAGVGYTF	Severe
C-COV19-045	TRBV28	TRBJ1-1	CASSLYKAEAFF	Severe	C-COV19-038	TRAV8-4	TRAJ11	CAVSPPGGYSTLTF	TRBV28	TRBJ2-1	CASSFIASSYNEQFF	Severe
C-COV19-045	TRBV27	TRBJ2-4	CASRGLTGPRGVKNIQYF	Severe	C-COV19-038	TRAV3	TRAJ11	CAVSPPGGYSTLTF	TRBV28	TRBJ2-1	CASSFIASSYNEQFF	Severe
C-COV19-045	TRBV20-1	TRBJ2-7	CSARERYYEQYF	Severe	C-COV19-046	TRAV34	TRAJ18	CGADENRGSTLGRLYF	TRBV7-3	TRBJ2-3	CASSLMGLAGGGTDTQYF	Mild
C-COV19-045	TRBV28	TRBJ2-1	CASSTLNKGGWDEQFF	Severe	C-COV19-046	TRAV2	TRAJ30	CAVEKMNRDDKIIF	TRBV5-1	TRBJ2-5	CASSSYPGLAPVQETQYF	Mild
C-COV19-045	TRBV20-1	TRBJ1-6	CSAQVGGNYNSPLHF	Severe	C-COV19-046	TRAV8-4	TRAJ30	CAVSGGPDKIIF	TRBV5-1	TRBJ2-5	CASSSYPGLAPVQETQYF	Mild
C-COV19-045	TRBV27	TRBJ2-5	CASSMSSPQETQYF	Severe	C-COV19-046	TRAV8-4	TRAJ30	CAVSGGPDKIIF	TRBV5-1	TRBJ2-5	CASSSYPGLAPVQETQYF	Mild
C-COV19-045	TRBV5-1	TRBJ2-5	CASSRAGGPQETQYF	Severe	C-COV19-046	TRAV2	TRAJ30	CAVEKMNRDDKIIF	TRBV5-1	TRBJ2-5	CASSSYPGLAPVQETQYF	Mild
C-COV19-045	TRBV12-3	TRBJ1-2	CASSSRGGSIYGYTF	Severe	C-COV19-046	TRAV8-4	TRAJ30	CAVSGGPDKIIF	TRBV5-1	TRBJ2-5	CASSSYPGLAPVQETQYF	Mild
C-COV19-045	TRBV5-1	TRBJ2-7	CASSLAGGPAHEQYF	Severe	C-COV19-046	TRAV12-3	TRAJ4	CAMSAQRGGYNKLIF	TRBV24-1	TRBJ2-1	CATSDLRVDEQFF	Mild
C-COV19-045	TRBV28	TRBJ1-2	CASSSITTTGAKDGYTF	Severe	C-COV19-046	TRAV8-3	TRAJ3	CAVPGYSSASKIIF	TRBV28	TRBJ2-1	CASSPGTEVYNEQFF	Mild
C-COV19-045	TRBV5-1	TRBJ2-5	CASSRAGGPQETQYF	Severe	C-COV19-046	TRAV8-4	TRAJ3	CAVPGYSSASKIIF	TRBV28	TRBJ2-1	CASSPGTEVYNEQFF	Mild
C-COV19-045	TRBV19	TRBJ1-6	CATSRAESFNSPLHF	Severe	C-COV19-046	TRAV8-4	TRAJ30	CAVSGGPDKIIF	TRBV5-1	TRBJ2-5	CASSSYPGLAPVQETQYF	Mild
C-COV19-038	TRBV5-1	TRBJ1-1	CASSLAGAEAFF	Severe	C-COV19-046	TRAV12-3	TRAJ4	CAMSAQRGGYNKLIF	TRBV24-1	TRBJ2-1	CATSDLRVDEQFF	Mild
C-COV19-038	TRBV27	TRBJ2-5	CASSPLVGERFRKETQYF	Severe	C-COV19-046	TRAV4	TRAJ17	CLVGDRAAGNKLTF	TRBV24-1	TRBJ2-1	CATSDLRVDEQFF	Mild
C-COV19-038	TRBV24-1	TRBJ1-2	CATSDLPGGYGYTF	Severe	C-COV19-046	TRAV12-3	TRAJ4	CAMSAQRGGYNKLIF	TRBV24-1	TRBJ2-1	CATSDLRVDEQFF	Mild
C-COV19-038	TRBV5-1	TRBJ1-6	CASSLAGISLDNSPLHF	Severe	C-COV19-046	TRAV8-1	TRAJ40	CAVTSTTSGTYKYIF	TRBV5-1	TRBJ2-7	CASSIQGQGYEQYF	Mild
C-COV19-038	TRBV5-1	TRBJ2-2	CASSLAGAGELFF	Severe	C-COV19-046	TRAV8-3	TRAJ44	CAVGTTGTASKLTF	TRBV27	TRBJ2-4	CASSLLAGGPEAKNIQYF	Mild
C-COV19-038	TRBV27	TRBJ2-4	CASSLITGGAKNIQYF	Severe	C-COV19-046	TRAV8-4	TRAJ44	CAVGTTGTASKLTF	TRBV27	TRBJ2-4	CASSLLAGGPEAKNIQYF	Mild
C-COV19-038	TRBV27	TRBJ2-4	CASSLITGGAKNIQYF	Severe	C-COV19-046	TRAV21	TRAJ23	CAVPPPNQGGKLIF	TRBV5-1	TRBJ2-2	CASSPRGQGNTGELFF	Mild
C-COV19-038	TRBV27	TRBJ2-4	CASSLITGGAKNIQYF	Severe	C-COV19-046	TRAV13-1	TRAJ23	CAPRGARMIYNQGGKLIF	TRBV5-1	TRBJ2-2	CASSPRGQGNTGELFF	Mild
C-COV19-038	TRBV5-1	TRBJ1-2	CASSLAGVGYTF	Severe	C-COV19-046	TRAV2	TRAJ30	CAVEKMNRDDKIIF	TRBV5-1	TRBJ2-5	CASSSYPGLAPVQETQYF	Mild
C-COV19-038	TRBV24-1	TRBJ2-1	CATSDLVTSGDEQFF	Severe	C-COV19-046	TRAV8-4	TRAJ30	CAVSGGPDKIIF	TRBV5-1	TRBJ2-5	CASSSYPGLAPVQETQYF	Mild
C-COV19-038	TRBV27	TRBJ2-4	CASSLITGGAKNIQYF	Severe	C-COV19-046	TRAV17	TRAJ42	CATVPGSQGNLIF	TRBV7-8	TRBJ2-2	CASSPRTGTTGELFF	Mild
C-COV19-038	TRBV5-1	TRBJ1-5	CASSLAGGTNQPQHF	Severe	C-COV19-046	TRAV8-4	TRAJ30	CAVSGGPDKIIF	TRBV5-1	TRBJ2-5	CASSSYPGLAPVQETQYF	Mild
C-COV19-038	TRBV5-1	TRBJ2-2	CASSLAGVMELFF	Severe	C-COV19-046	TRAV9-2	TRAJ8	CALMNTGFQKLVF	TRBV9	TRBJ2-2	CASSPFPLPTGELFF	Mild
C-COV19-038	TRBV5-1	TRBJ2-7	CASSFAGGPAYEQYF	Severe	C-COV19-046	TRAV17	TRAJ42	CATVPGSQGNLIF	TRBV6-5	TRBJ2-7	CASSYRQGSYEQYF	Mild
C-COV19-038	TRBV24-1	TRBJ2-3	CATSDLATSAADTQYF	Severe	C-COV19-046	TRAV8-4	TRAJ30	CAVSGGPDKIIF	TRBV5-1	TRBJ2-5	CASSSYPGLAPVQETQYF	Mild
C-COV19-038	TRBV5-1	TRBJ1-1	CASSLAGSFMNTEAFF	Severe	C-COV19-046	TRAV21	TRAJ23	CAVPPPNQGGKLIF	TRBV15	TRBJ1-3	CATSSMGNSGNTIYF	Mild
C-COV19-038	TRBV5-1	TRBJ2-1	CASSLAGGPLHEQFF	Severe	C-COV19-046	TRAV2	TRAJ30	CAVEKMNRDDKIIF	TRBV5-1	TRBJ2-5	CASSSYPGLAPVQETQYF	Mild
C-COV19-038	TRBV24-1	TRBJ1-2	CATSDLPGKDGYTF	Severe	C-COV19-046	TRAV2	TRAJ30	CAVEKMNRDDKIIF	TRBV5-1	TRBJ2-5	CASSSYPGLAPVQETQYF	Mild
C-COV19-038	TRBV24-1	TRBJ2-3	CATSDRTGDTDTQYF	Severe	C-COV19-046	TRAV12-3	TRAJ4	CAMSAQRGGYNKLIF	TRBV24-1	TRBJ2-1	CATSDLRVDEQFF	Mild
C-COV19-038	TRBV27	TRBJ2-4	CASSLITGGAKNIQYF	Severe
C-COV19-038	TRBV27	TRBJ2-7	CASSTNMNEQYF	Severe
C-COV19-038	TRBV5-1	TRBJ1-2	CASSLAGVGYTF	Severe
C-COV19-038	TRBV10-3	TRBJ2-3	CAISEPGTSGGAILDTQYF	Severe
C-COV19-038	TRBV27	TRBJ2-4	CASSLITGGAKNIQYF	Severe
C-COV19-038	TRBV20-1	TRBJ1-1	CSARDQGAEAFF	Severe
C-COV19-038	TRBV28	TRBJ2-1	CASSFIASSYNEQFF	Severe
C-COV19-038	TRBV27	TRBJ2-1	CASSSLTSGAYNEQFF	Severe
C-COV19-038	TRBV24-1	TRBJ2-1	CATSDLVTSGDEQFF	Severe
C-COV19-046	TRBV5-1	TRBJ2-5	CASSSYPGLAPVQETQYF	Mild
C-COV19-046	TRBV7-3	TRBJ2-3	CASSLMGLAGGGTDTQYF	Mild
C-COV19-046	TRBV5-1	TRBJ2-5	CASSSYPGLAPVQETQYF	Mild
C-COV19-046	TRBV5-1	TRBJ2-5	CASSSYPGLAPVQETQYF	Mild
C-COV19-046	TRBV5-1	TRBJ2-5	CASSSYPGLAPVQETQYF	Mild
C-COV19-046	TRBV5-1	TRBJ2-5	CASSSYPGLAPVQETQYF	Mild
C-COV19-046	TRBV24-1	TRBJ2-1	CATSDLRVDEQFF	Mild
C-COV19-046	TRBV5-1	TRBJ2-5	CASSSYPGLAPVQETQYF	Mild
C-COV19-046	TRBV28	TRBJ2-1	CASSPGTEVYNEQFF	Mild
C-COV19-046	TRBV28	TRBJ2-1	CASSPGTEVYNEQFF	Mild
C-COV19-046	TRBV5-1	TRBJ2-5	CASSSYPGLAPVQETQYF	Mild
C-COV19-046	TRBV27	TRBJ1-6	CASSLFIPGQPNSPLHF	Mild
C-COV19-046	TRBV5-1	TRBJ2-5	CASSSYPGLAPVQETQYF	Mild
C-COV19-046	TRBV5-1	TRBJ2-5	CASSSYPGLAPVQETQYF	Mild
C-COV19-046	TRBV28	TRBJ2-4	CASSPIETAKNIQYF	Mild
C-COV19-046	TRBV24-1	TRBJ2-1	CATSDLRVDEQFF	Mild
C-COV19-046	TRBV24-1	TRBJ2-1	CATSDLRVDEQFF	Mild
C-COV19-046	TRBV5-1	TRBJ2-1	CASSLAGGPYNEQFF	Mild
C-COV19-046	TRBV5-1	TRBJ2-7	CASSIQGQGYEQYF	Mild
C-COV19-046	TRBV27	TRBJ2-4	CASSLLAGGPEAKNIQYF	Mild
C-COV19-046	TRBV5-1	TRBJ2-2	CASSPRGQGNTGELFF	Mild
C-COV19-046	TRBV5-1	TRBJ2-5	CASSSYPGLAPVQETQYF	Mild
C-COV19-046	TRBV5-1	TRBJ1-5	CASSLAGAQPQHF	Mild
C-COV19-046	TRBV5-1	TRBJ2-5	CASSSYPGLAPVQETQYF	Mild
C-COV19-046	TRBV7-8	TRBJ2-2	CASSPRTGTTGELFF	Mild
C-COV19-046	TRBV5-1	TRBJ2-5	CASSSYPGLAPVQETQYF	Mild
C-COV19-046	TRBV5-1	TRBJ2-5	CASSSYPGLAPVQETQYF	Mild
C-COV19-046	TRBV9	TRBJ2-2	CASSPFPLPTGELFF	Mild
C-COV19-046	TRBV5-1	TRBJ2-5	CASSSYPGLAPVQETQYF	Mild
C-COV19-046	TRBV6-5	TRBJ2-7	CASSYRQGSYEQYF	Mild
C-COV19-046	TRBV27	TRBJ2-5	CASSPLTGGGWEKETQYF	Mild
C-COV19-046	TRBV5-1	TRBJ2-5	CASSSYPGLAPVQETQYF	Mild
C-COV19-046	TRBV20-1	TRBJ2-1	CSARVSGTYNEQFF	Mild
C-COV19-046	TRBV28	TRBJ2-1	CASSNRDRVYNEQFF	Mild
C-COV19-046	TRBV5-1	TRBJ2-7	CASSLAGAREQYF	Mild
C-COV19-046	TRBV15	TRBJ1-3	CATSSMGNSGNTIYF	Mild
C-COV19-046	TRBV5-1	TRBJ2-5	CASSSYPGLAPVQETQYF	Mild
C-COV19-046	TRBV5-1	TRBJ2-5	CASSSYPGLAPVQETQYF	Mild
C-COV19-046	TRBV27	TRBJ2-5	CASSPLTGGGWEKETQYF	Mild
C-COV19-046	TRBV24-1	TRBJ2-1	CATSDLRVDEQFF	Mild
C-COV19-046	TRBV24-1	TRBJ2-1	CATSDLRVDEQFF	Mild
